# Supplementary material
Source: publisher figshare collection journal article supplement (https://tandf.figshare.com/articles/dataset/_/8218388)
Supplement: Supplementary file 1 [file 3]

Archive with 2 entries (2 files):
- krnb_a_1621623_sm8537.pdf
- krnb_a_1621623_sm4874.pdf
