# Supplementary material
Source: publisher figshare collection journal article supplement (https://tandf.figshare.com/articles/dataset/_/8218388)
Supplement: Supplementary file 1 [file 3 › krnb_a_1621623_sm4874.pdf]

**Supplementary Table 1: Strains used in this study**

| Strain Name | Genotype                                                    | Source                                |
|-------------|-------------------------------------------------------------|---------------------------------------|
| yPIR1       | MATa his3D1 leu2D0 met15D0 ura3D0 ('BY4741')                | 20                                    |
| yPIR4       | MATa leu2 ura3 his3 met15 eIF4G1-GFP (HIS)                  | 15                                    |
| yPIR7       | MATa his3D1 leu2 ura3 his3 met15 SBP1-GST::KanMX            | Bhatter <i>et al.</i> , (unpublished) |
| yPIR8       | MATa his3D1 leu2 ura3 his3 met15 SBP1-GST::KanMX hmt1Δ::Hyg | Bhatter <i>et al.</i> , (unpublished) |
| yPIR9       | MATa leu2 ura3 his3 met15 Sbp1-GFP (HIS)                    | Bhatter <i>et al.</i> , (unpublished) |
| yPIR13      | MATa leu2 ura3 his3 met15 Scd6-GFP (HIS)                    | 15                                    |
| yPIR54      | MATa leu2 ura3 his3 met15 Scd6-GFP (HIS) hmt1Δ::KanMX       | This study                            |
| yPIR14      | MATa leu2 ura3 his3 met15 Scd6-TAP (HIS)                    | A kind gift from Roy Parker           |
| yPIR15      | MATa leu2 ura3 his3 met15 Scd6-TAP (HIS) hmt1Δ::Hyg         | This Study                            |

**Supplementary Table 2: Plasmids used in this study**

| Plasmid Name/number | Description                                                                                                                                | Vector  | Source                                |
|---------------------|--------------------------------------------------------------------------------------------------------------------------------------------|---------|---------------------------------------|
| pPIR1               | Used to express full length Scd6 with His- and FLAG tag at N- and C-terminus respectively                                                  | pPROEX1 | 15                                    |
| pPIR2               | Used to express Scd6ΔRGG with His- and FLAG tag at N- and C-terminus respectively                                                          | pPROEX1 | 15                                    |
| pPIR3               | Used to express full length Hmt1 with His-tag at N-terminus                                                                                | pET28b  | A kind gift from Anita Corbett        |
| pPIR4               | Used to express full length GST                                                                                                            | pGEX6P3 | 20                                    |
| pPIR6               | 2μ plasmid with gal-inducible promoter used as empty vector control                                                                        | BG1805  | 20                                    |
| pPIR13              | 2μ plasmid expressing GST-Scd6 under gal-inducible promoter                                                                                | pEGH    | 20                                    |
| pPIR14              | 2μ plasmid used for expressing Sbp1 under galactose promoter                                                                               | BG1805  | Bhatter <i>et al.</i> , (unpublished) |
| pPIR15              | 2μ plasmid expressing Sbp1ΔRGG (Δ 125 to 167 amino acid) under gal-inducible promoter                                                      | BG1805  | Bhatter <i>et al.</i> , (unpublished) |
| pPIR29              | Used for expressing Sbp1 with N-terminal 6X His tag and C-terminal FLAG tag cloned using BamH1 and Xho1 restriction site                   | pPROEX1 | Bhatter <i>et al.</i> , (unpublished) |
| pPIR47              | Used for expressing full length eIF4G1 tagged N-terminus to GST and C-terminus to 6X-HIS                                                   | pGEX6P3 | 15                                    |
| pPIR83              | Used for expressing full length Scd6 tagged N-terminus to GST and C-terminus to 6X-HIS                                                     | pGEX6P3 | 15                                    |
| pPIR84              | Used for expressing only RGG domain of Scd6 tagged N-terminus to GST and C-terminus to 6X-HIS                                              | pGEX6P3 | This Study                            |
| pPIR96              | 2μ plasmid to express Scd6mCherry under its own promoter                                                                                   | pYES    | This Study                            |
| pPIR93              | Cen plasmid to express Scd6GFP under its own promoter                                                                                      | pRS316  | This Study                            |
| pPIR94              | Cen plasmid to express Scd6GFPΔRGG under its own promoter                                                                                  | pRS316  | This Study                            |
| pPIR57              | Used for expressing Sbp1 with N-terminal 6X His tag and C-terminal GFP tag                                                                 | pPROEX1 | This Study                            |
| pPIR58              | Used for expressing Sbp1ΔRGG with N-terminal 6X His tag and C-terminal GFP tag                                                             | pPROEX1 | This Study                            |
| pPIR85              | Used to express Scd6R288A, R292A, R294A, R298A, R301A, R304A, R306A, R310A, R316A with His- and FLAG tag at N- and C-terminus respectively | pPROEX1 | This Study                            |
| pPIR77              | 2μ plasmid expressing GST-Scd6ΔRGG under gal-inducible promoter                                                                            | pEGH    | This Study                            |
| pPIR103             | Used for expressing eIF4G1 with His tag at N and C terminus                                                                                | pET28a  | This Study                            |
