# Supplementary material
Source: publisher figshare collection journal article supplement (https://tandf.figshare.com/articles/dataset/_/8218388)
Supplement: Supplementary file 1 [file 3 › krnb_a_1621623_sm8537.pdf]

**a**

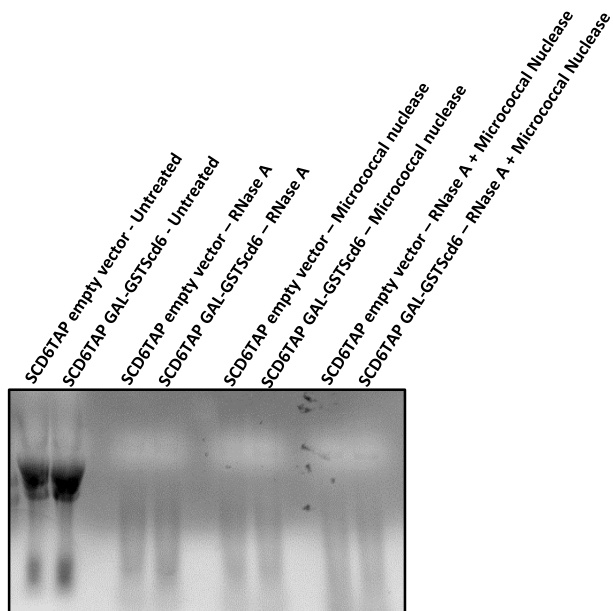

**b**

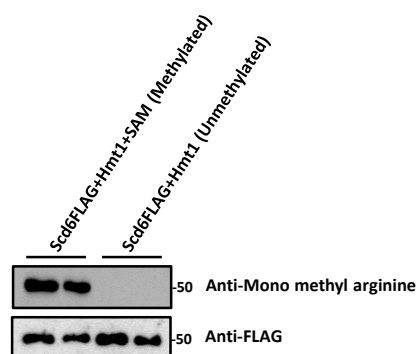

**c**

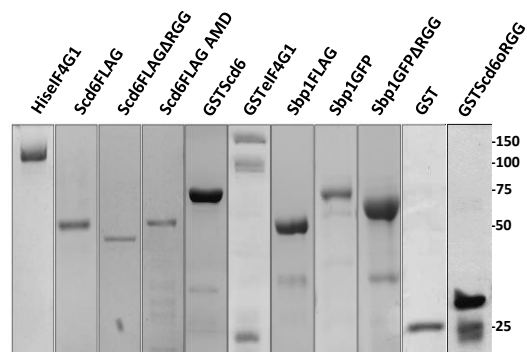

**d**

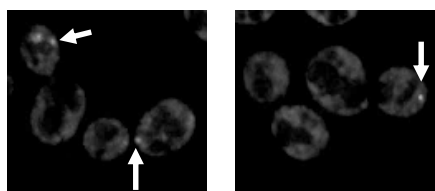

Supplementary Figure 1: a) RNA was isolated from the lysates used for the experiment shown in Fig.1d and ran on 1.2% Formamide-agarose gel to check if the nuclease treatment degraded cellular RNA. b) Recombinant purified Scd6 was *in vitro* methylated using purified Hmt1 and SAM. A part of the reaction was loaded on SDS-PAGE in duplicates followed by western blotting with anti-Mono methyl arginine antibody and anti-FLAG antibody. c) Representative CBB stained gels of purified proteins. d) SBP1GFP expressing cells were grown until OD<sub>600</sub> 0.35-0.5 followed by live cell imaging. Two representative images have been shown.
